# Supplementary material for: Simple, scalable mechanosynthesis of metal–organic frameworks using liquid-assisted resonant acoustic mixing (LA-RAM)
Source: Royal Society of Chemistry journal article supplement (doi:10.1039/d0sc00333f), 2020-01-01
Supplement: d0sc00333f2.pdf [file d0sc00333f2.pdf]

# New Approach to Synthesising Metal-organic Frameworks

Manufacturing materials in chemistry can require laborious and environmentally toxic solvent-based processes

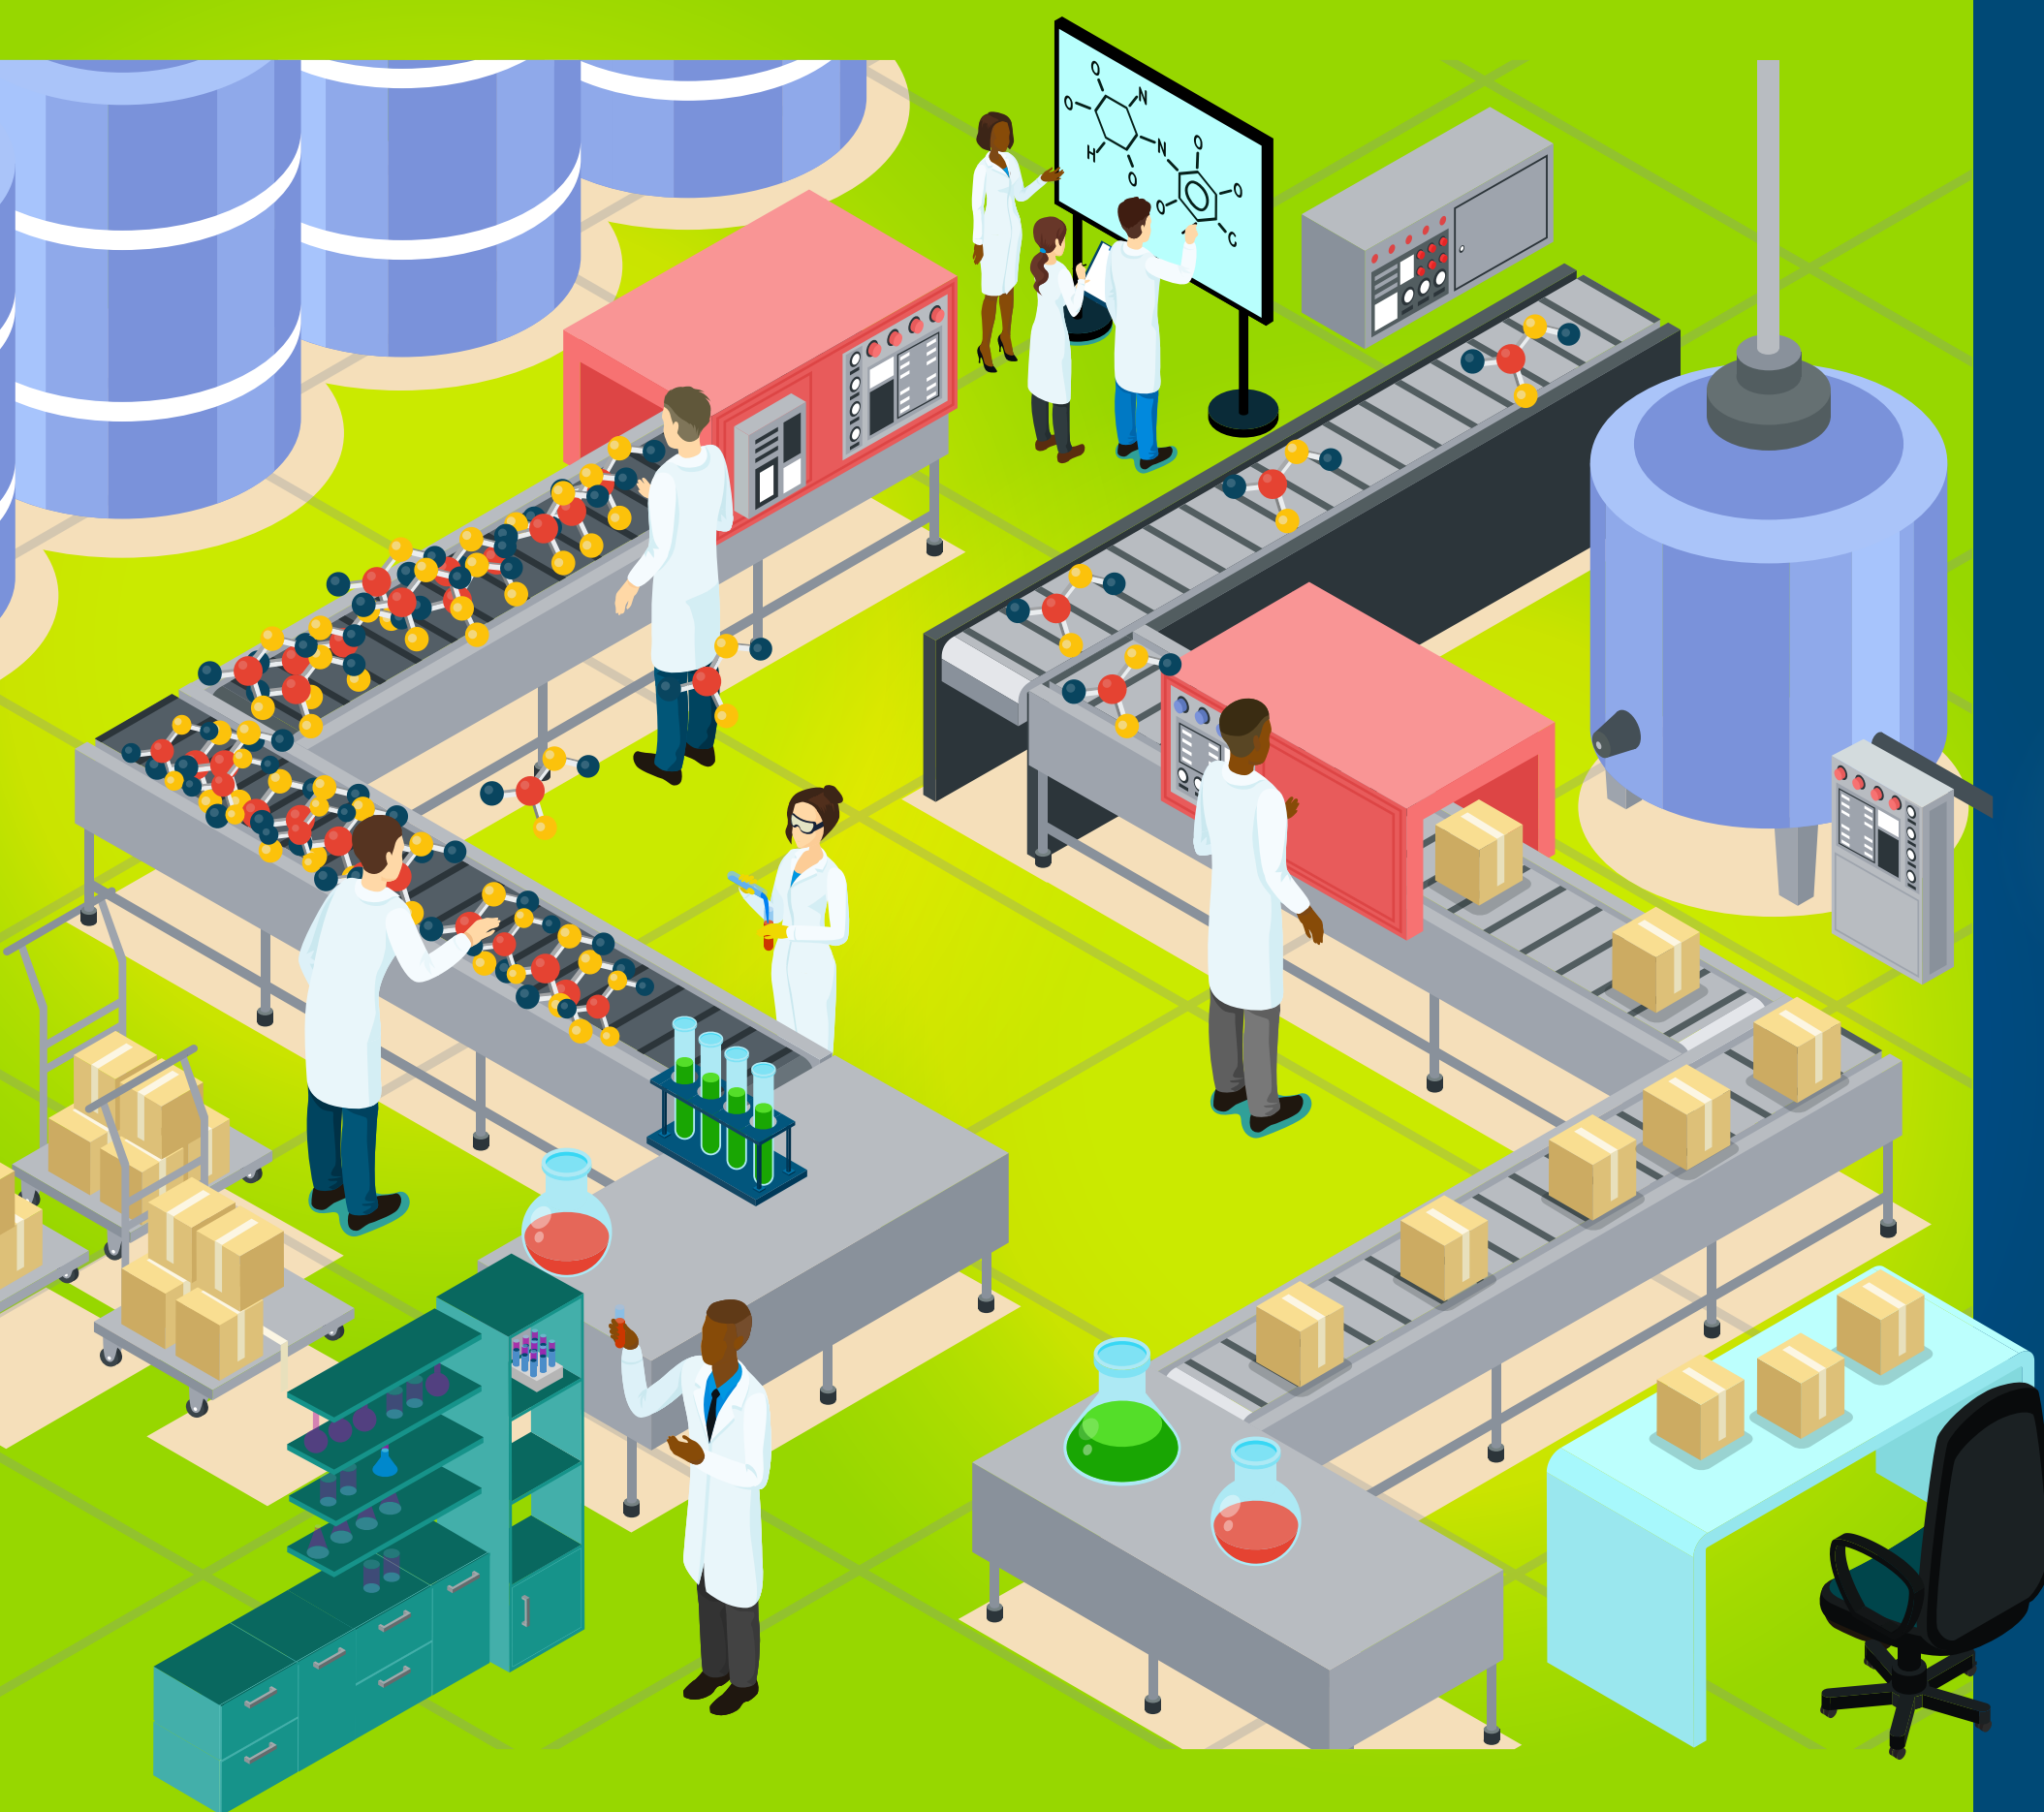

Sample agitation using ultrasonic or acoustic frequency is a solution, but this has been applied to only cocrystals until now

Can we use these methods to synthesise metal-organic frameworks?

New liquid-assisted resonant acoustic mixing (LA-RAM) approach

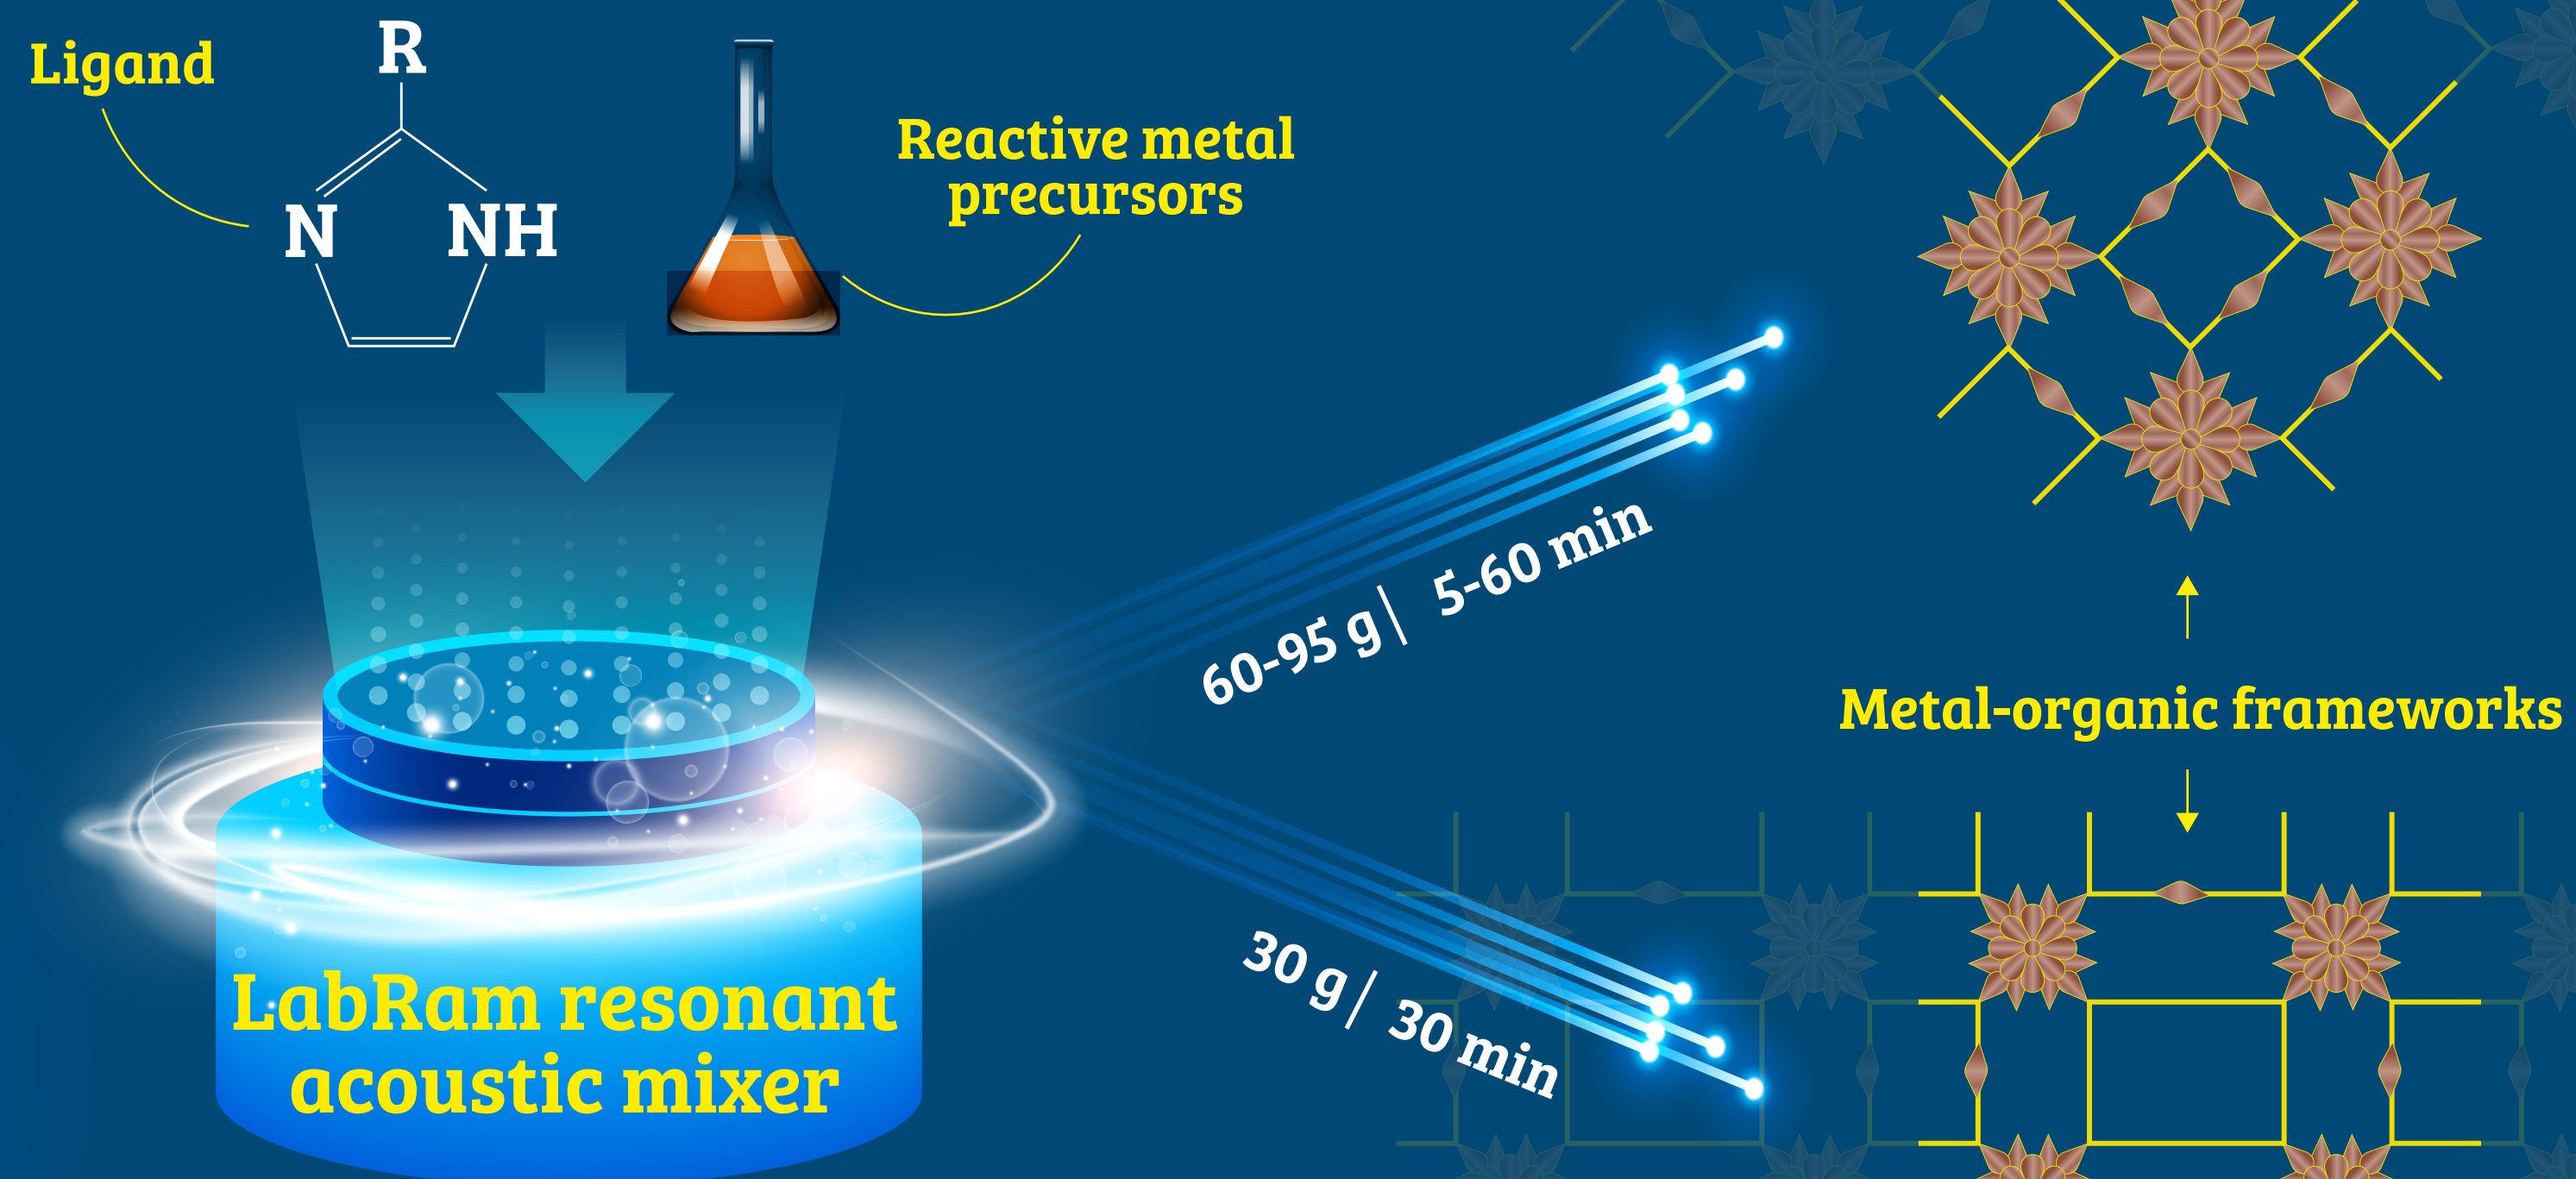

Straightforward scale-up from milligrams to at least 25 g

**A greener, more economical method for the large-scale synthesis of metal-organic frameworks was developed**

**Chemical  
Science**

Simple, scalable mechanosynthesis of metal organic frameworks using liquid-assisted resonant acoustic mixing (LA-RAM)

Frišić *et al.* (2020)

DOI: 10.1039/D0SC00333F

**ROYAL SOCIETY  
OF CHEMISTRY**
